# Supplementary material for: The emergence of subaerial crust and onset of weathering 3.7 billion years ago
Source: Research Square preprint supplement (doi:10.21203/rs.3.rs-98804/v1), 2020-11-10
Supplement: Supplementary file 3 [file 8bd1b0b612200f387134ec80.xlsx]

## Sheet: Table S2
Supplementary table S2
Sr, S and O isotope data of Archean barites
Sample name	Location	Age (Ma)	Barite morphology	87Sr/86Sr	2s	d34SV-CDT	2s	D33SV-CDT	2s	d18OV-SMOW	2s	Ref S-isotopes	Ref O-isotopes
LON-02-A1 1	Londozi, Swaziland	3520	Granular	0.70083	8e-06	6.37222	0.016	-1.0072	0.02	10.4572	0.466	Roerdink et al. 2012	This study
LON-02-A1 2	Londozi, Swaziland	3520	Granular	0.700845	9e-06	4.7754	0.006	-1.05734	0.028	8.84437	0.788	Roerdink et al. 2012	This study
LON-02-A1 4	Londozi, Swaziland	3520	Granular	0.700735	8e-06	6.41844	0.016	-1.01622	0.024	9.33667	0.547	Roerdink et al. 2012	This study
LON-02-A1 5	Londozi, Swaziland	3520	Granular	0.700723	9e-06	4.24682	0.01	-1.07138	0.018	9.59295	0.19	Roerdink et al. 2012	This study
LON-02-B1 1	Londozi, Swaziland	3520	Granular	0.70076	9e-06	5.80946	0.006	-1.01222	0.026	10.1027	0.19	Roerdink et al. 2012	This study
LON-02-B1 2	Londozi, Swaziland	3520	Granular	0.700741	8e-06	9.39903	0.012	-0.799652	0.028	n/a	n/a	Roerdink et al. 2012
LON-02-B1 3	Londozi, Swaziland	3520	Granular	0.70075	9e-06	6.41744	0.014	-0.923988	0.034	n/a	n/a	Roerdink et al. 2012
LON-02-D2 1	Londozi, Swaziland	3520	Granular	0.700732	9e-06	6.82945	0.006	-0.937018	0.004	n/a	n/a	Roerdink et al. 2012
LON-02-E1 1	Londozi, Swaziland	3520	Granular	0.70063	8e-06	5.25374	0.006	-1.05733	0.004	10.7128	0.19	Roerdink et al. 2012	This study
LON-02-E1 2	Londozi, Swaziland	3520	Granular	0.700644	9e-06	5.14019	0.008	-1.03829	0.02	9.95117	0.19	Roerdink et al. 2012	This study
LON-02-F1 1	Londozi, Swaziland	3520	Granular	0.700623	9e-06	6.77318	0.028	-1.04128	0.032	n/a	n/a	Roerdink et al. 2012
LON-02-F1 2	Londozi, Swaziland	3520	Granular	0.700676	1.5e-05	5.95518	0.014	-1.0453	0.008	n/a	n/a	Roerdink et al. 2012
LON-02-G1 1	Londozi, Swaziland	3520	Granular	0.700774	8e-06	5.79539	0.008	-1.0463	0.016	n/a	n/a	Roerdink et al. 2012
LON-02-G1 2	Londozi, Swaziland	3520	Granular	0.700716	8e-06	4.91408	0.008	-1.07338	0.012	n/a	n/a	Roerdink et al. 2012
LON-02-I1 2	Londozi, Swaziland	3520	Granular	0.700643	9e-06	4.93519	0.02	-1.03829	0.032	9.31535	0.554	Roerdink et al. 2012	This study
LON-02-I1 3	Londozi, Swaziland	3520	Granular	0.700777	9e-06	6.01849	0.01	-1.01422	0.034	9.97867	0.243	Roerdink et al. 2012	This study
LON-01-A1	Londozi, Swaziland	3520	Bladed	0.700545	8e-06	4.91509	0.01	-1.15288	0.014	11.4015	0.472	Roerdink et al. 2012	This study
LON-01-A2	Londozi, Swaziland	3520	Bladed	0.700578	8e-06	5.54785	0.012	-1.12854	0.006	n/a	n/a	Roerdink et al. 2012
LON-01-A3	Londozi, Swaziland	3520	Granular	0.700707	9e-06	3.59262	0.01	-1.0319	0.006	10.1751	0.679	Roerdink et al. 2012	This study
LON-01-A4	Londozi, Swaziland	3520	Granular	0.700722	8e-06	3.77015	0.012	-0.997677	0.032	10.3109	0.275	Roerdink et al. 2012	This study
LON-01-B1	Londozi, Swaziland	3520	Granular	0.700859	9e-06	4.78478	0.006	-1.0537	0.034	n/a	n/a	Roerdink et al. 2012
LON-01-D1	Londozi, Swaziland	3520	Granular	0.701001	9e-06	5.85468	0.01	-1.05363	0.018	n/a	n/a	Roerdink et al. 2012
LON-01-E1	Londozi, Swaziland	3520	Granular	0.701004	9e-06	5.03769	0.02	-1.0433	0.048	n/a	n/a	Roerdink et al. 2012
DB-1	Dresser Fm, Australia	3490	Bladed	0.700588	9e-06	3.58424	0.05	-1.28999	0.03	n/a	n/a	Roerdink et al. 2012
VER-01 A	Vergelegen, S Africa	3410	Bladed	0.700874	9e-06	4.5091	0.012	-0.883899	0.042	12.0594	0.19	Roerdink et al. 2012	This study
VER-01 B	Vergelegen, S Africa	3410	Bladed	0.700806	9e-06	4.93519	0.008	-0.879886	0.032	9.65775	0.19	Roerdink et al. 2012	This study
VER-01 C	Vergelegen, S Africa	3410	Bladed	0.700806	9e-06	3.99056	0.008	-0.867862	0.008	10.2207	0.209	Roerdink et al. 2012	This study
VER-01 D	Vergelegen, S Africa	3410	Bladed	0.700814	9e-06	2.91128	0.014	-0.996195	0.01	9.60267	0.447	Roerdink et al. 2012	This study
VER-01 E	Vergelegen, S Africa	3410	Bladed	0.700839	9e-06	4.59351	0.018	-0.867858	0.03	n/a	n/a	Roerdink et al. 2012
VER-01 F	Vergelegen, S Africa	3410	Bladed	0.700907	9e-06	3.44087	0.008	-0.864858	0.01	n/a	n/a	Roerdink et al. 2012
VER-02 1	Vergelegen, S Africa	3410	Granular	0.701108	9e-06	4.49001	0.012	-0.401676	0.022	10.2767	0.264	Roerdink et al. 2012	This study
VER-02 2	Vergelegen, S Africa	3410	Granular	0.701117	9e-06	4.43172	0.01	-0.432755	0.02	10.4259	0.356	Roerdink et al. 2012	This study
TR-03 1	Amo, S Africa	3260	Granular	0.701391	9e-06	4.14934	0.022	-0.576121	0.026	11.1951	0.317	Roerdink et al. 2012	This study
TR-03-2	Amo, S Africa	3260	Granular	0.701414	9e-06	2.90425	0.02	-0.550063	0.008	10.2089	0.272	Roerdink et al. 2012	This study
TR-04 1	Stentor, S Africa	3260	Granular	0.701242	9e-06	4.59854	0.014	-0.544037	0.032	11.1227	0.598	Roerdink et al. 2012	This study
TR-04-2 1	Stentor, S Africa	3260	Granular	0.701096	8e-06	4.67491	0.022	-0.430749	0.014	11.1956	0.441	Roerdink et al. 2012	This study
TR-04-2 2	Stentor, S Africa	3260	Granular	0.701125	8e-06	5.65571	0.018	-0.472849	0.042	n/a	n/a	Roerdink et al. 2012
FT-155.5 1	Barite Valley, S Africa	3245	Bladed	0.701324	9e-06	3.46097	0.012	-0.404691	0.028	8.02	0.33	Roerdink et al. 2012	Montinaro et al. 2015
FT-155.5 2	Barite Valley, S Africa	3245	Bladed	0.701351	9e-06	3.99458	0.014	-0.475868	0.02	9.05	0.37	Roerdink et al. 2012	Montinaro et al. 2015
FT-173	Barite Valley, S Africa	3245	Bladed	0.701239	9e-06	4.57241	0.018	-0.583136	0.028	12.435	0.19	Roerdink et al. 2012	Montinaro et al. 2015
FT-179	Barite Valley, S Africa	3245	Bladed	0.701246	1.2e-05	4.1001	0.014	-0.465842	0.04	11.92	0.19	Roerdink et al. 2012	Montinaro et al. 2015
FT-188.2 1	Barite Valley, S Africa	3245	Bladed	0.701478	8e-06	6.25464	0.02	-0.408682	0.034	11.05	0.19	Roerdink et al. 2012	Montinaro et al. 2015
BV-06-1	Barite Valley, S Africa	3245	Weathered	0.702084	9e-06	n/a	n/a	n/a	n/a	n/a	n/a
BV-06-2	Barite Valley, S Africa	3245	Weathered	0.701786	8e-06	n/a	n/a	n/a	n/a	n/a	n/a
DW-13A-1	Dharwar, India	3200	Granular	0.701989	9e-06	4.68918	0.109166	-0.523653	0.0472586	n/a	n/a	This study
DW-13B-1	Dharwar, India	3200	Granular	0.701669	8e-06	6.00653	0.226092	-0.459678	0.0373624	n/a	n/a	This study
DW-13C-1	Dharwar, India	3200	Granular	0.701824	9e-06	5.00969	0.132485	-0.491209	0.0376187	n/a	n/a	This study
DW-11-1	Dharwar, India	3200	Bladed	0.701333	9e-06	4.90986	0.11777	-0.51725	0.0391501	n/a	n/a	This study
Sr isotope values (University of Bergen) are reported in this table are corrected against a value of SRM987 = 0.710240
S isotope values (University of Maryland) are reported against V-CDT
O isotope values (University of Munster) are reported against V-SMOW
n/a = not analyzed
